# Supplementary material for: Enhancer promoter interactome and Mendelian randomization identify network of druggable vascular genes in coronary artery disease
Source: Hum Genomics. 2022 Mar 4;16:8. doi: 10.1186/s40246-022-00381-4 (PMC8895522; doi:10.1186/s40246-022-00381-4)
Supplement: Supplementary file 9 — Additional file 9. Supplemental Table 9: Mendelian randomization of 3D and eQTL mapped genes. [file 40246_2022_381_MOESM9_ESM.xlsx]

## Sheet: Feuil1
Supplemental Table 9: Mendelian randomization of 3D and eQTL mapped genes .
Gene_Ensembl_ID	Gene_symbol	IV	Cochran_test_pval	OR_IVW	OR_IVW_95CI_lower	OR_IVW_95CI_upper	IVW_P	IVW_FDR
ENSG00000140451	PIF1	3	0.564289	1.05385	1.0123	1.09711	0.0105942	0.0229277
ENSG00000055118	KCNH2	5	0.955166	1.0315	1.01583	1.04741	7.1443e-05	0.000258981
ENSG00000163875	MEAF6	5	0.224282	0.957762	0.925388	0.991268	0.0138987	0.0283846
ENSG00000026652	AGPAT4	3	0.213562	0.945729	0.913621	0.978966	0.0015441	0.00422443
ENSG00000137486	ARRB1	3	0.293828	0.848673	0.789237	0.912585	9.4567e-06	3.91778e-05
ENSG00000140545	MFGE8	3	0.0630417	1.13134	1.09307	1.17095	2.08592e-12	3.36065e-11
ENSG00000183049	CAMK1D	5	0.140258	1.11941	1.07488	1.16577	5.12288e-08	3.37644e-07
ENSG00000143387	CTSK	3	0.103005	1.1133	1.07703	1.1508	2.14674e-10	2.59398e-09
ENSG00000165757	JCAD	6	0.445989	1.09893	1.07672	1.12161	1.38662e-19	3.06778e-18
ENSG00000140945	CDH13	12	0.229092	1.09543	1.07474	1.11653	7.53251e-21	2.18443e-19
ENSG00000119718	EIF2B2	5	0.284701	1.07774	1.04626	1.11017	7.42784e-07	3.98903e-06
ENSG00000173327	MAP3K11	3	0.196785	1.07749	1.05047	1.10521	8.45535e-09	7.21191e-08
ENSG00000180263	FGD6	4	0.273199	1.07572	1.05202	1.09994	1.33559e-10	1.76055e-09
ENSG00000164068	RNF123	4	0.264278	1.05717	1.01906	1.0967	0.00299505	0.00723803
ENSG00000143153	ATP1B1	6	0.0645397	1.05705	1.02245	1.09283	0.00108441	0.00305181
ENSG00000158186	MRAS	9	0.896262	1.0518	1.04107	1.06265	4.79689e-22	2.31849e-20
ENSG00000163935	SFMBT1	4	0.82139	1.0456	1.02399	1.06766	2.85463e-05	0.000111871
ENSG00000132313	MRPL35	8	0.325764	1.03952	1.01564	1.06396	0.00107861	0.00305181
ENSG00000166839	ANKDD1A	6	0.527494	1.02439	1.00816	1.04088	0.00310001	0.00736887
ENSG00000113971	NPHP3	10	0.0860332	1.0243	1.00613	1.0428	0.00856333	0.0188134
ENSG00000151917	BEND6	8	0.12999	1.02278	1.00723	1.03857	0.00394727	0.00923153
ENSG00000149084	HSD17B12	12	0.642215	0.973237	0.962757	0.983831	9.05729e-07	4.69038e-06
ENSG00000143156	NME7	13	0.36448	0.971963	0.957764	0.986373	0.000152261	0.00050177
ENSG00000103671	TRIP4	8	0.671251	0.96876	0.954088	0.983658	4.57927e-05	0.000170255
ENSG00000164045	CDC25A	4	0.502209	0.968653	0.955459	0.982031	5.3342e-06	2.41706e-05
ENSG00000117477	CCDC181	5	0.103786	0.965117	0.944764	0.985908	0.00109444	0.00305181
ENSG00000103811	CTSH	5	0.0679826	0.963354	0.937913	0.989485	0.00625521	0.014172
ENSG00000091542	ALKBH5	4	0.248277	0.955311	0.9222	0.989612	0.0110797	0.0236258
ENSG00000170647	TMEM133	7	0.0702449	0.944762	0.926467	0.963419	1.23258e-08	9.4065e-08
ENSG00000104936	DMPK	3	0.117236	0.89361	0.856603	0.932216	1.86149e-07	1.17355e-06
ENSG00000182218	HHIPL1	3	0.64526	0.872425	0.848507	0.897017	6.41225e-22	2.32444e-20
ENSG00000168487	BMP1	4	0.582231	0.872285	0.838576	0.90735	1.08235e-11	1.56941e-10
ENSG00000169554	ZEB2	3	0.14585	0.861185	0.812122	0.913212	5.93118e-07	3.30777e-06
