# Supplementary material for: Enhancer promoter interactome and Mendelian randomization identify network of druggable vascular genes in coronary artery disease
Source: Hum Genomics. 2022 Mar 4;16:8. doi: 10.1186/s40246-022-00381-4 (PMC8895522; doi:10.1186/s40246-022-00381-4)
Supplement: Supplementary file 12 — Additional file 12. Supplemental Table 12: sensitivity analysis of causal vascular genes for CAD. [file 40246_2022_381_MOESM12_ESM.xlsx]

## Sheet: Feuil1
Supplemental Table 12: sensitivity analysis of causal vascular genes for CAD.
(WM: weighted median)
Gene	IV	OR_WM	OR_WM_95CI_lower	OR_WM_95CI_upper	WM_P
MFGE8	3	1.14556	1.09294	1.20071	1.47493e-08
CAMK1D	5	1.11123	1.0508	1.17514	0.000218308
CTSK	3	1.1289	1.07563	1.18479	8.7981e-07
JCAD	6	1.09624	1.06563	1.12772	2.02511e-10
CDH13	12	1.10823	1.07838	1.13889	1.59788e-13
EIF2B2	5	1.09166	1.05737	1.12707	7.23646e-08
MAP3K11	3	1.07323	1.04111	1.10634	5.15585e-06
FGD6	4	1.07877	1.05017	1.10816	3.20834e-08
RNF123	4	1.05082	1.01095	1.09227	0.0120224
ATP1B1	6	1.06352	1.03059	1.0975	0.000124279
SFMBT1	4	1.0426	1.01709	1.06875	0.000963444
MRPL35	8	1.04398	1.0155	1.07326	0.00228718
MRAS	9	1.05292	1.03987	1.06613	5.176e-16
KCNH2	5	1.03237	1.01388	1.05119	0.000550702
NPHP3	10	1.02695	1.00882	1.0454	0.00343126
ANKDD1A	6	1.02433	1.00379	1.04528	0.0200328
BEND6	8	1.01819	1.00342	1.03319	0.015633
CTSH	5	0.966149	0.945916	0.986815	0.00142697
NME7	13	0.974318	0.956111	0.992872	0.00686656
CCDC181	5	0.963962	0.945601	0.982681	0.000183654
HSD17B12	12	0.974561	0.96105	0.988261	0.000296941
TRIP4	8	0.973491	0.955205	0.992128	0.0054891
CDC25A	4	0.969787	0.95466	0.985154	0.000130972
TMEM133	7	0.941587	0.922329	0.961248	1.14001e-08
DMPK	3	0.885708	0.83858	0.935485	1.35824e-05
ZEB2	3	0.86989	0.792176	0.955229	0.00350849
ARRB1	3	0.844561	0.7534	0.946753	0.00374493
BMP1	4	0.870665	0.82902	0.914402	3.05302e-08
HHIPL1	3	0.874144	0.838004	0.911843	4.26728e-10
